# Supplementary material for: Genome-scale rates of evolutionary change in bacteria
Source: PubMed Central journal article supplement (PMC5320706; doi:10.1099/mgen.0.000094), 2016-11-30
Supplement: mgen-02-94-s001.pdf [file mgen-02-94-s001.pdf]

## Supplementary material

**Figure S1.** Regression of root-to-tip distance (expected substitutions per site) as a function of sampling time for an *Acinetobacter baumannii* GC2 data set. The points in red correspond to the phylogenetic tree using all SNPs in the genome, and therefore includes recombining sites. The points in blue were obtained after filtering sites with evidence of recombination using Gubbins. The lines represent the linear regression for each set of points. The nucleotide substitution rate estimates for the SNP data and whole genomes are shown for both sets of points. Importantly, that the regression line in red has a negative slope incorrectly suggests a lack of temporal structure and an over-dispersed molecular clock, whereas that in blue correctly demonstrates that the data have considerable temporal structure and reasonable clock-like behavior.

**Figure S2.** Estimated genomic substitution rates in human-associated bacterial pathogens and tip-date randomisations. Points correspond to the mean estimate and the error bars are the 95% HPD values. Data points in black are for the estimates obtained with the correct sampling times, while those in orange were obtained using the tip-date randomisations.

**Figure S3.** Heatmap of statistical support for different combinations of molecular clock and demographic models, estimated using marginal likelihood. Rows correspond to bacterial data sets and are sorted in descending order according to their Bayesian mean genomic rate estimate, as shown. The columns represent the different combinations of molecular clock and demographic models; cell colours indicate the ranking of statistical support for each data set; from red (highest marginal likelihood) to light yellow (lowest marginal likelihood).

**Figure S4.** Residual plots for rate as a function of sampling time according to the double exponential decay function  $y = -5.93/x^{-0.17}$ , where  $y$  and  $x$  correspond to the substitution rate and sampling time in  $\log_{10}$  scale. (A) shows the residuals as a function of the fitted substitution rate, where each point corresponds to a bacterial data set. (B) is the probability density of the residuals.

**Table S1.** Information on the bacterial data sets used in this study, including parameter estimates and the corresponding references.

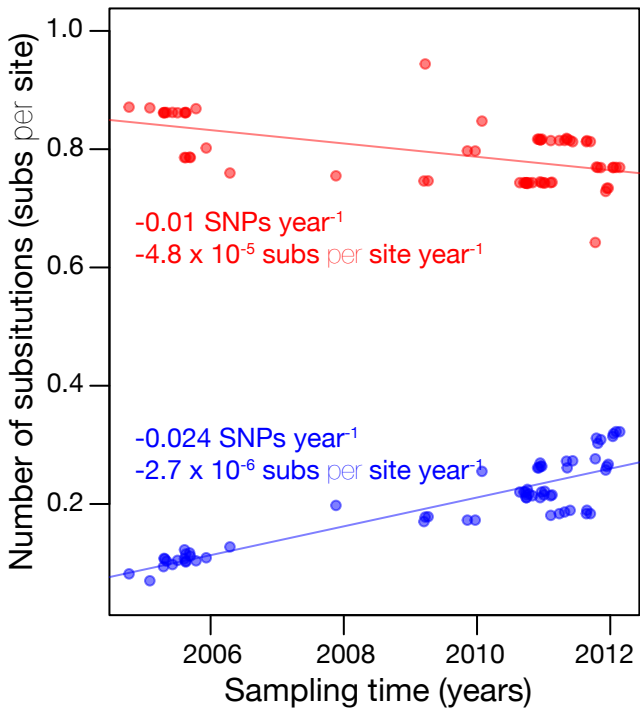

Substitution rate (subs per site year<sup>-1</sup>)

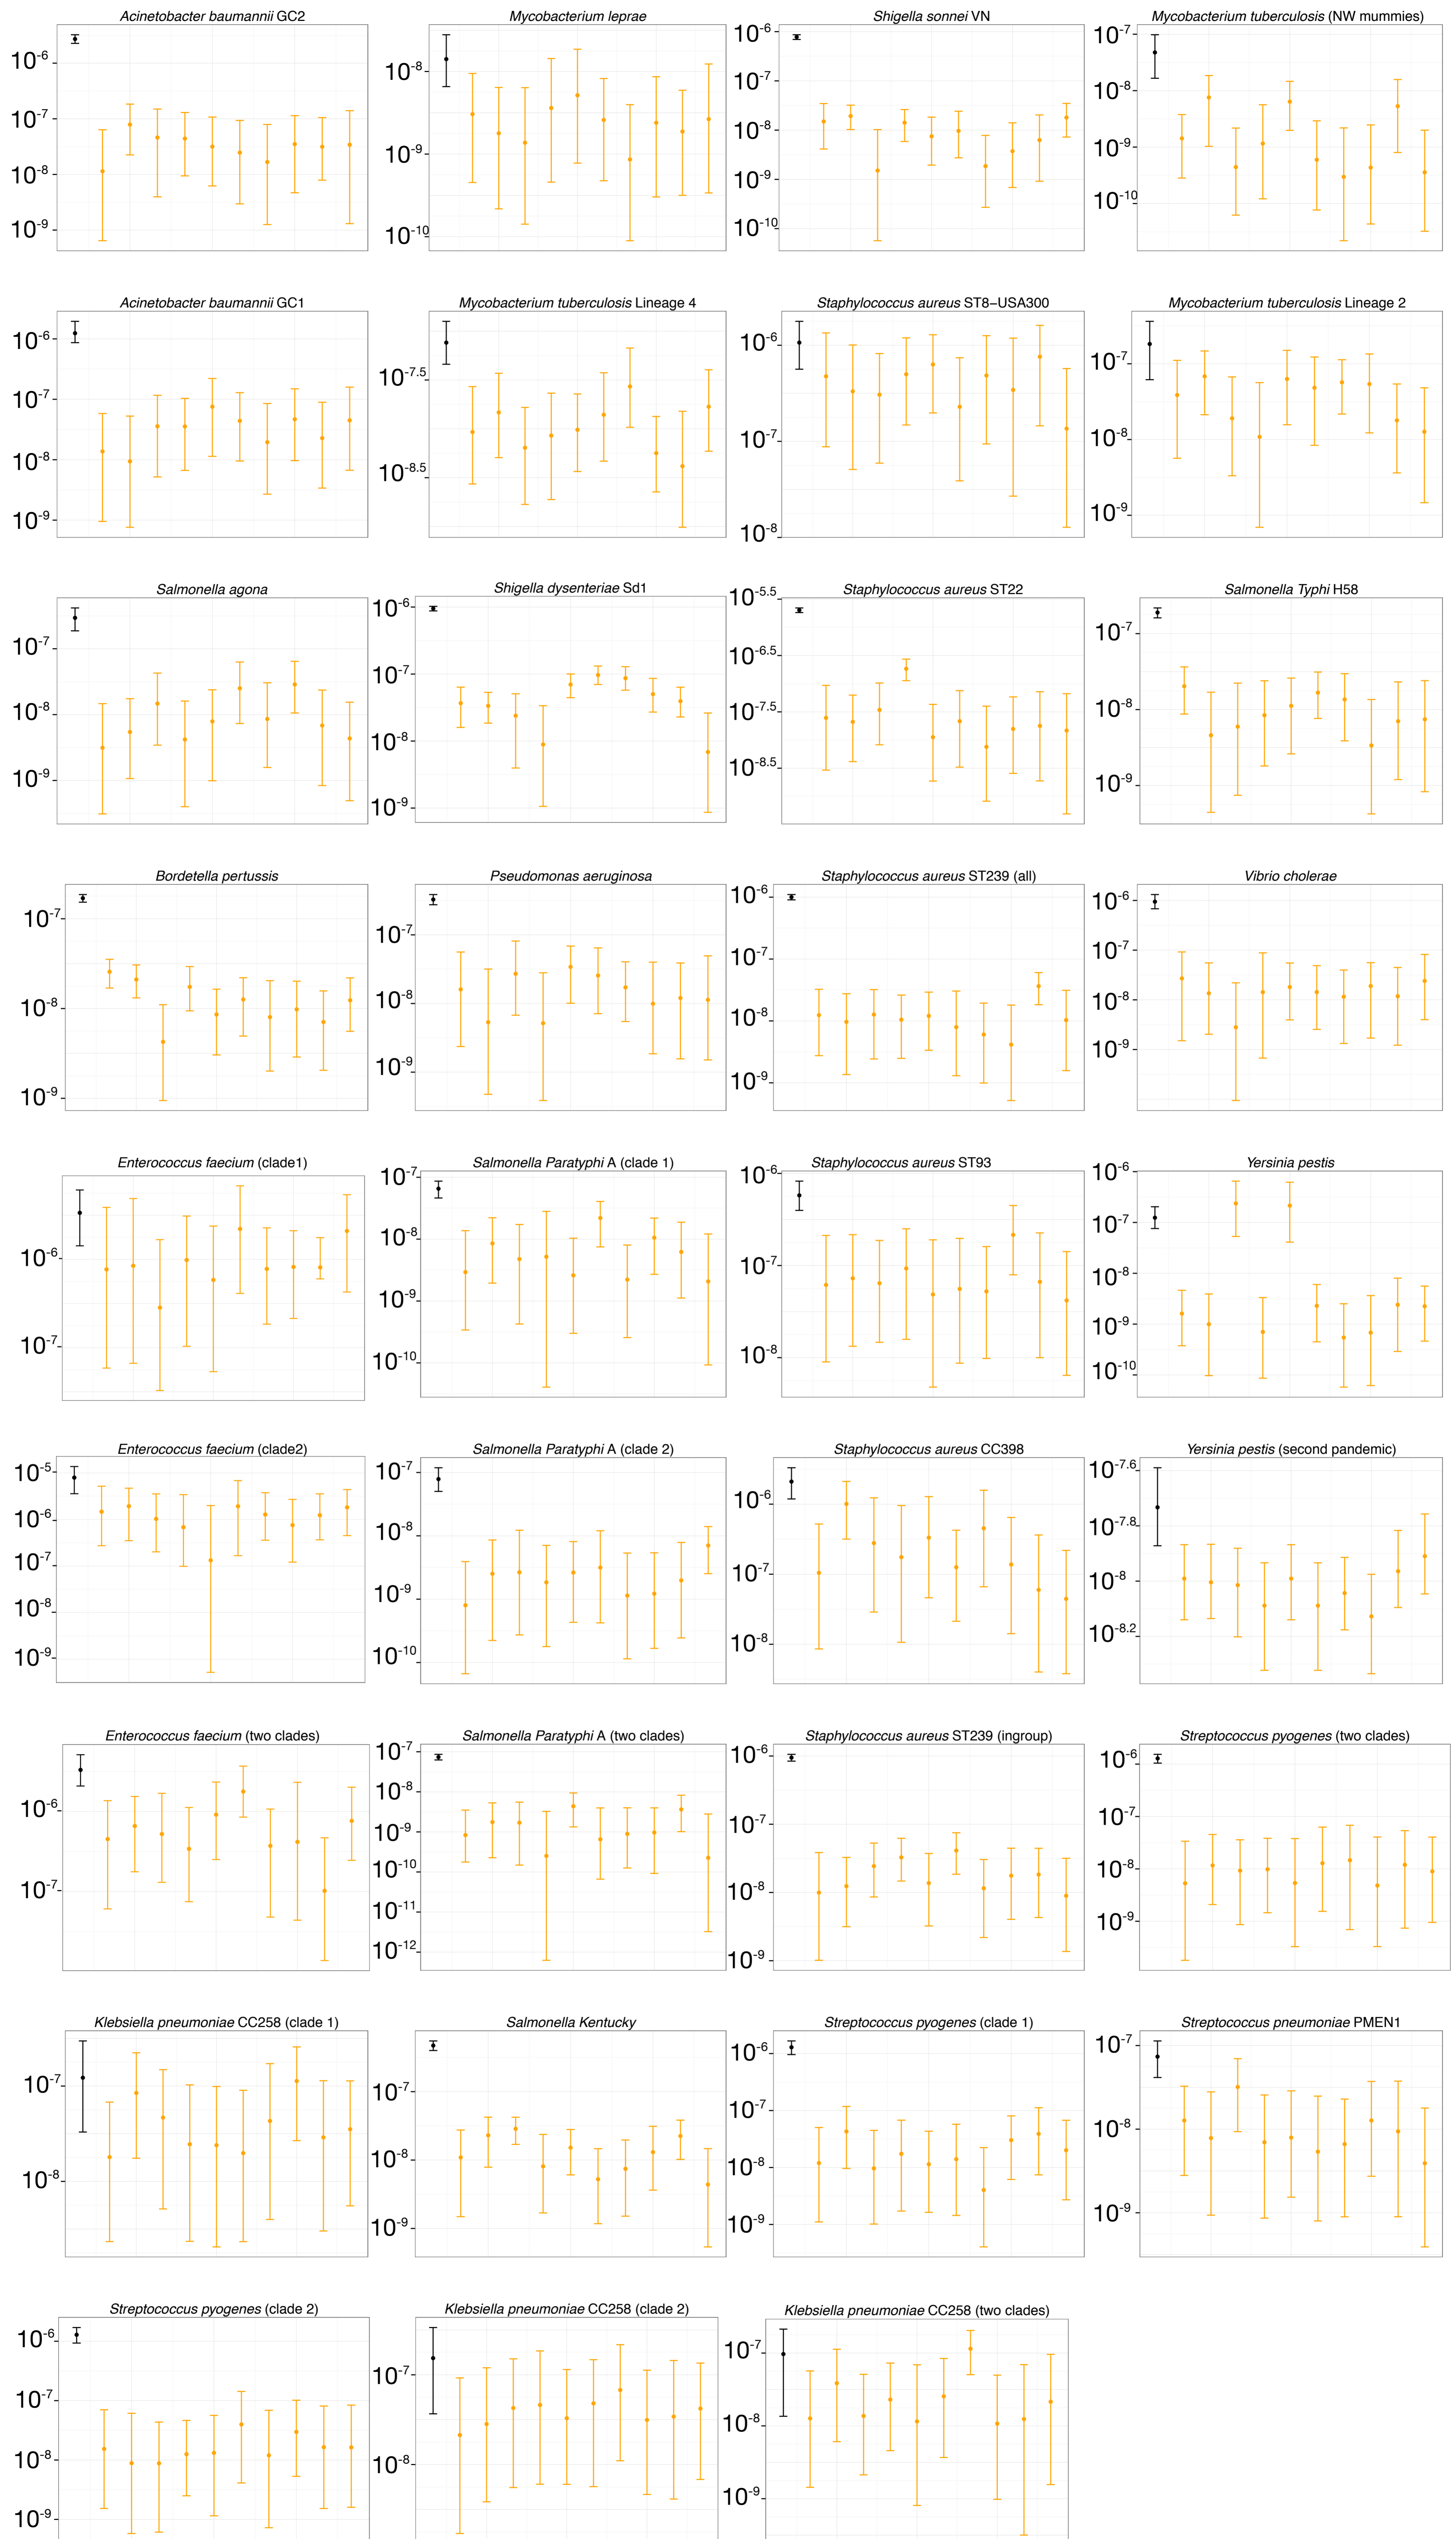

## Support for clock and demographic model

## Bacterial species and mean rate (subs per site year<sup>-1</sup>)

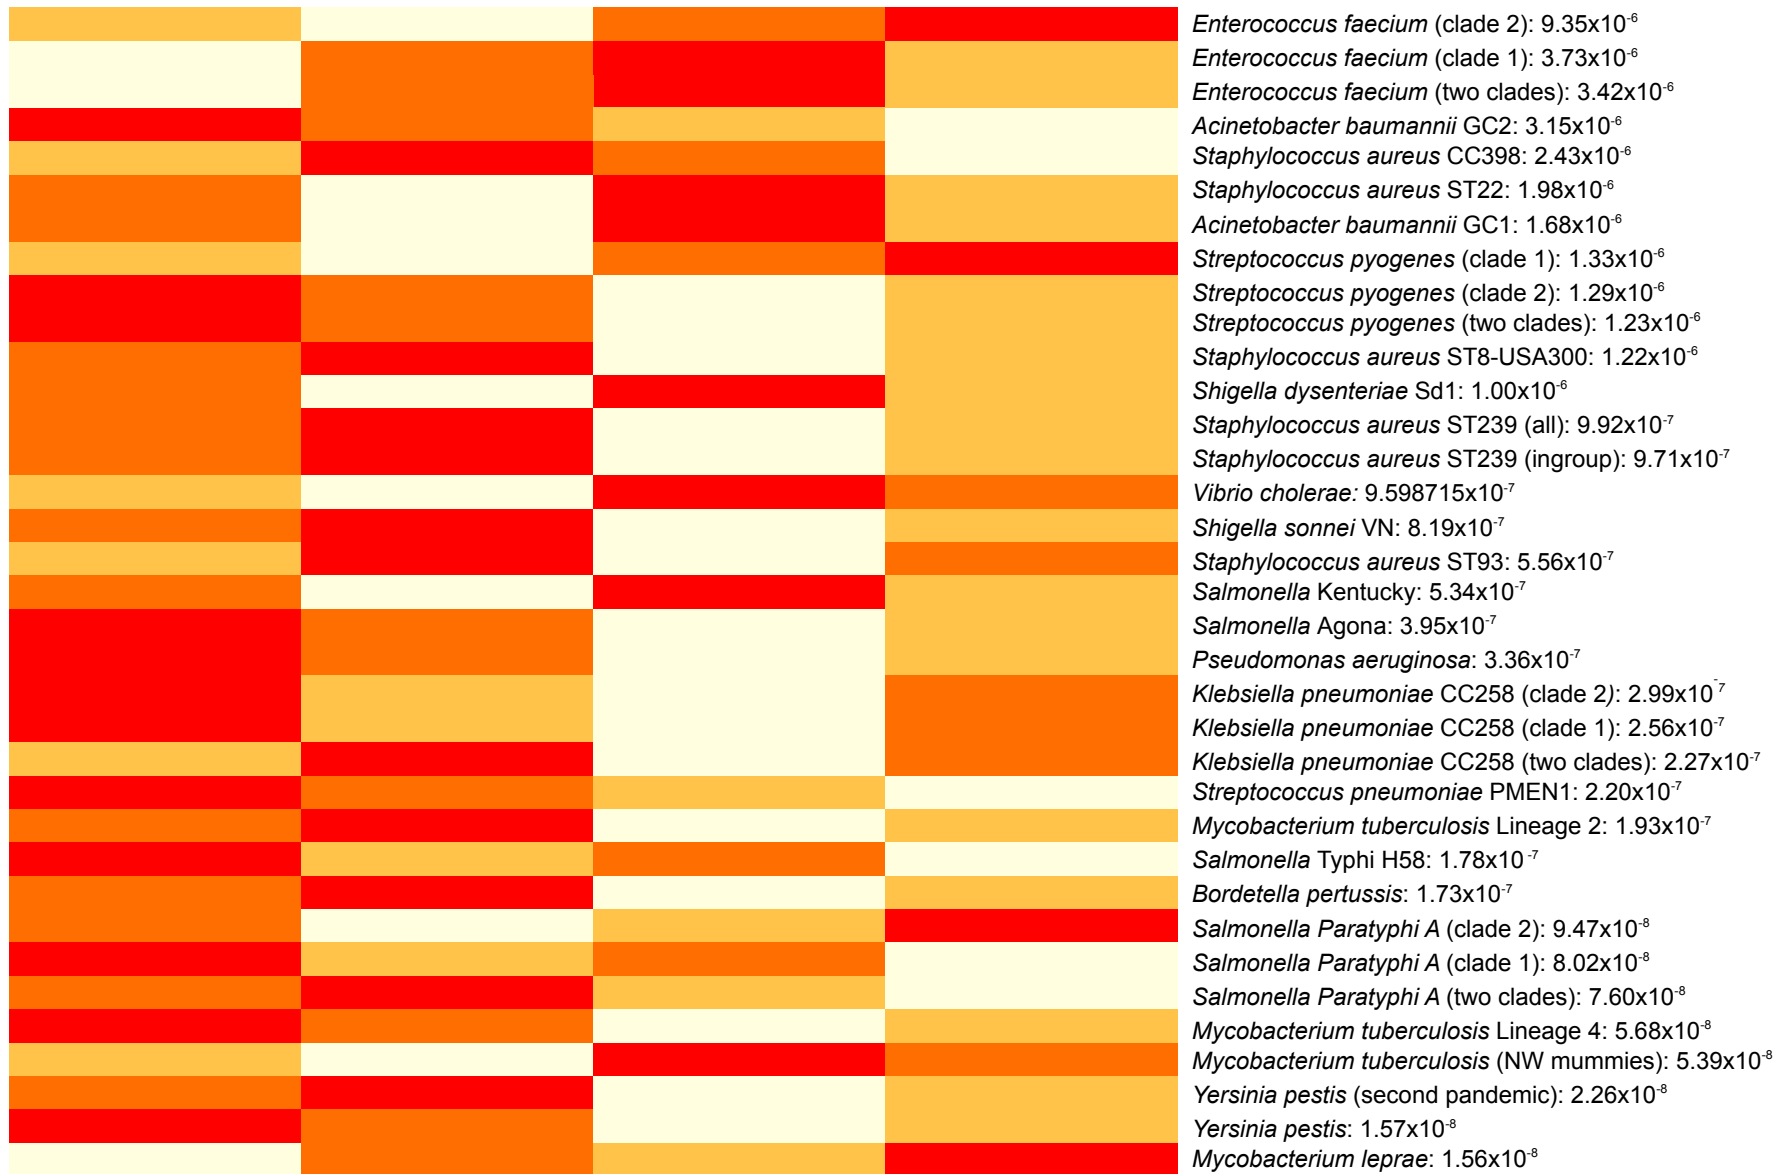

Strict clock  
+  
Constant-size

Strict clock  
+  
Skyline

Uncorrelated  
lognormal clock  
+  
Constant-size

Uncorrelated  
lognormal clock  
+  
Skyline

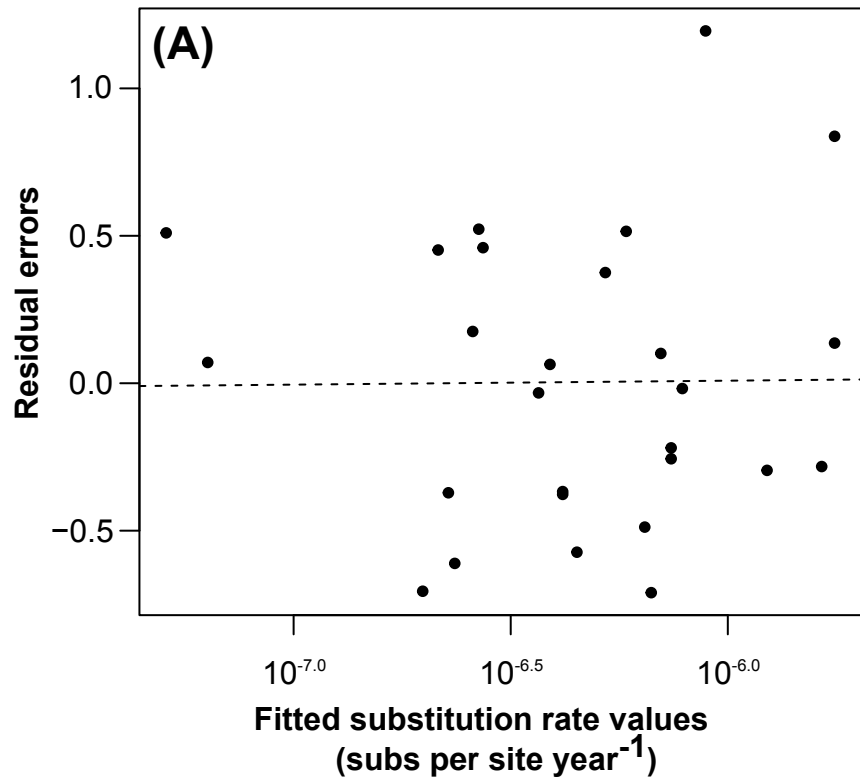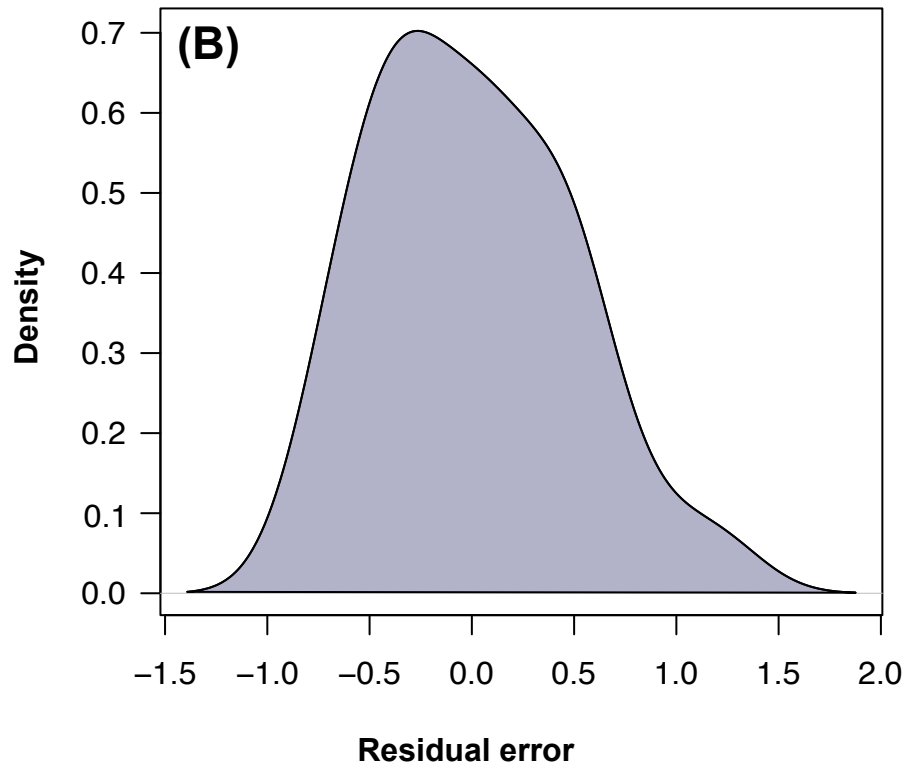

| Number of recombinant | RDP methods | Species                           | Model           | CR1 | CR2 | Regression rate (subs per site year <sup>-1</sup> ) | Beast genomic rate (subs per site year <sup>-1</sup> ) | Sampling time (years) |
|-----------------------|-------------|-----------------------------------|-----------------|-----|-----|-----------------------------------------------------|--------------------------------------------------------|-----------------------|
| 0                     | None        | <i>Mycobacterium leprae</i>       | strict/constant | 0.8 | 0.4 | $4.63 \times 10^{-9}$                               | $1.56216 \times 10^{-8}$                               | 1993                  |
| 0                     | None        | <i>Yersinia pestis</i>            | uclid/constant  | 1   | 0.8 | $6.88 \times 10^{-9}$                               | $1.57264 \times 10^{-8}$                               | 1506                  |
| 0                     | None        | <i>Yersinia pestis</i>            | uclid/constant  | 1   | 0.5 | $-6.27 \times 10^{-9}$                              | $2.26097 \times 10^{-8}$                               | 657                   |
| 0                     | None        | <i>Mycobacterium tuberculosis</i> | uclid/constant  | 1   | 0.9 | $6.30 \times 10^{-8}$                               | $5.67521 \times 10^{-8}$                               | 13.17                 |
| 46                    | RGBMST      | <i>Neisseria meningitidis</i>     | uclid/constant  | 0.7 | 0   | $3.34 \times 10^{-7}$                               | $6.04966 \times 10^{-8}$                               | 59                    |
| 0                     | None        | <i>Salmonella enterica</i>        | uclid/constant  | 1   | 1   | $5.43 \times 10^{-8}$                               | $7.60404 \times 10^{-8}$                               | 84                    |
| 0                     | None        | <i>Salmonella enterica</i>        | uclid/constant  | 1   | 1   | $4.77 \times 10^{-8}$                               | $8.01648 \times 10^{-8}$                               | 60                    |
| 0                     | None        | <i>Salmonella enterica</i>        | strict/constant | 1   | 1   | $6.83 \times 10^{-8}$                               | $9.47397 \times 10^{-8}$                               | 58                    |
| 0                     | None        | <i>Bordetella pertussis</i>       | uclid/constant  | 1   | 1   | $2.51 \times 10^{-7}$                               | $1.72569 \times 10^{-7}$                               | 63                    |
| 0                     | None        | <i>Salmonella enterica</i>        | uclid/skyline   | 1   | 1   | $1.26 \times 10^{-7}$                               | $1.78159 \times 10^{-7}$                               | 21                    |
| 0                     | None        | <i>Mycobacterium tuberculosis</i> | uclid/constant  | 1   | 0.3 | $-7.59 \times 10^{-9}$                              | $1.92695 \times 10^{-7}$                               | 16                    |
| 0                     | None        | <i>Streptococcus pneumoniae</i>   | uclid/skyline   | 1   | 0.9 | $1.61 \times 10^{-7}$                               | $2.20099 \times 10^{-7}$                               | 24                    |
| 0                     | None        | <i>Pseudomonas aeruginosa</i>     | uclid/constant  | 1   | 1   | $2.59 \times 10^{-7}$                               | $3.36228 \times 10^{-7}$                               | 35                    |
| 0                     | None        | <i>Salmonella enterica</i>        | uclid/constant  | 1   | 1   | $1.13 \times 10^{-7}$                               | $3.95293 \times 10^{-7}$                               | 38                    |
| 0                     | None        | <i>Salmonella enterica</i>        | uclid/constant  | 1   | 1   | $2.89 \times 10^{-7}$                               | $5.34566 \times 10^{-7}$                               | 77                    |
| 0                     | None        | <i>Staphylococcus aureus</i>      | strict/skyline  | 1   | 0.9 | $2.63 \times 10^{-7}$                               | $5.55592 \times 10^{-7}$                               | 17                    |
| 0                     | None        | <i>Klebsiella pneumoniae</i>      | strict/skyline  | 8   | 0   | $1.27 \times 10^{-7}$                               | $2.26961 \times 10^{-7}$                               | 7                     |
| 0                     | None        | <i>Klebsiella pneumoniae</i>      | strict/skyline  | 6   | 0.8 | $1.25 \times 10^{-7}$                               | $2.56136 \times 10^{-7}$                               | 7                     |
| 0                     | None        | <i>Shigella dysenteriae</i>       | uclid/constant  | 1   | 1   | $8.02 \times 10^{-7}$                               | $1.00633 \times 10^{-6}$                               | 96                    |
| 0                     | None        | <i>Shigella sonnei</i>            | uclid/constant  | 1   | 1   | $6.33 \times 10^{-7}$                               | $8.19116 \times 10^{-7}$                               | 15                    |

|   |        |                                   |                 |     |     |                        |                          |       |
|---|--------|-----------------------------------|-----------------|-----|-----|------------------------|--------------------------|-------|
| 0 | None   | <i>Klebsiella pneumoniae</i>      | strict/skyline  | 8   | 0   | $3.05 \times 10^{-7}$  | $2.98841 \times 10^{-7}$ | 6     |
| 0 | None   | <i>Vibrio cholerae</i>            | strict/skyline  | 1   | 1   | $9.80 \times 10^{-7}$  | $9.59872 \times 10^{-7}$ | 73    |
| 0 | None   | <i>Staphylococcus aureus</i>      | uclid/constant  | 1   | 1   | $8.05 \times 10^{-7}$  | $9.70923 \times 10^{-7}$ | 32    |
| 0 | None   | <i>Staphylococcus aureus</i>      | uclid/constant  | 1   | 1   | $8.05 \times 10^{-7}$  | $9.92258 \times 10^{-7}$ | 32    |
| 0 | None   | <i>Staphylococcus aureus</i>      | uclid/constant  | 0.4 | 0   | $8.20 \times 10^{-7}$  | $1.22035 \times 10^{-6}$ | 2.15  |
| 0 | None   | <i>Streptococcus pyogenes</i>     | uclid/constant  | 1   | 1   | $9.60 \times 10^{-7}$  | $1.22659 \times 10^{-6}$ | 16    |
| 0 | None   | <i>Streptococcus pyogenes</i>     | uclid/constant  | 1   | 1   | $9.88 \times 10^{-7}$  | $1.28798 \times 10^{-6}$ | 7     |
| 0 | None   | <i>Streptococcus pyogenes</i>     | strict/constant | 1   | 1   | $1.05 \times 10^{-6}$  | $1.33584 \times 10^{-6}$ | 16    |
| 0 | None   | <i>Acinetobacter baumannii</i>    | uclid/constant  | 1   | 1   | $1.38 \times 10^{-6}$  | $1.68093 \times 10^{-6}$ | 29    |
| 5 | RGBMST | <i>Staphylococcus aureus</i>      | uclid/constant  | 1   | 1   | $1.57 \times 10^{-6}$  | $1.98 \times 10^{-6}$    | 18.72 |
| 4 | RGBMST | <i>Enterococcus faecium</i>       | uclid/constant  | 0.6 | 0   | $2.33 \times 10^{-6}$  | $3.73 \times 10^{-6}$    | 7     |
| 0 | None   | <i>Acinetobacter baumannii</i>    | uclid/skyline   | 1   | 1   | $2.53 \times 10^{-6}$  | $3.15317 \times 10^{-6}$ | 7.41  |
| 0 | None   | <i>Staphylococcus aureus</i>      | uclid/skyline   | 0.9 | 0.6 | $1.48 \times 10^{-6}$  | $2.43158 \times 10^{-6}$ | 9.57  |
| 8 | RGBMST | <i>Enterococcus faecium</i>       | uclid/constant  | 0.9 | 0.6 | $6.00 \times 10^{-7}$  | $3.42 \times 10^{-6}$    | 18    |
| 8 | RGBMST | <i>Enterococcus faecium</i>       | uclid/skyline   | 0.9 | 0.5 | $-1.91 \times 10^{-7}$ | $9.35 \times 10^{-6}$    | 10    |
| 0 | None   | <i>Mycobacterium tuberculosis</i> | uclid/constant  | 1   | 0.9 | $6.26 \times 10^{-8}$  | $5.39148 \times 10^{-8}$ | 895   |
